# Supplementary material
Source: Springer Nature journal article supplement (https://www.springerprofessional.de/resource/supplementary/13638_2012_509_MOESM7_ESM.pdf/11897884)

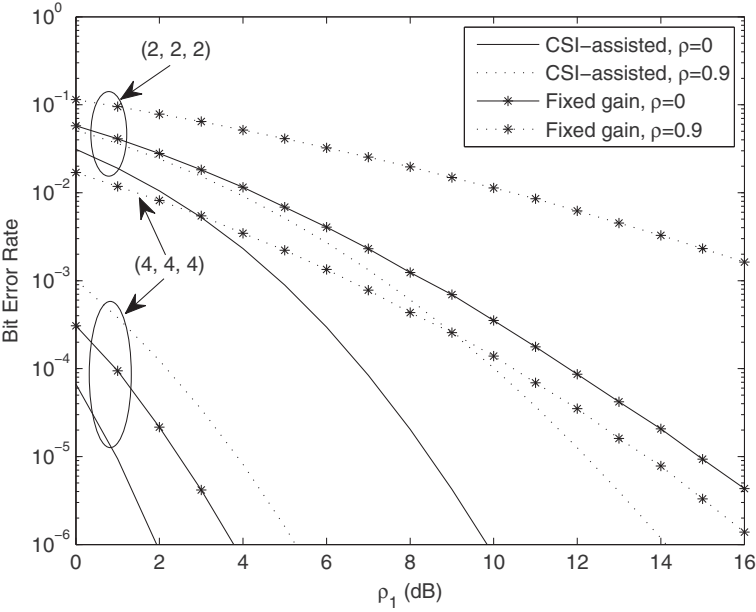

Supplement: MOESM7 [file 11897884]
